# Supplementary material for: Efficacy and safety assessment of acupuncture and nimodipine to treat mild cognitive impairment after cerebral infarction: a randomized controlled trial
Source: Springer Nature journal article supplement (doi:10.1186/s12906-016-1337-0), 2016-09-13
Supplement: MOESM1 [file 10696658]

# Montreal Cognitive Assessment (MoCA) Beijing Version

## 蒙特利尔认知评估北京版

出生日期：  
教育水平：  
性别：

姓名：  
检查日期：

### 视空间与执行功能

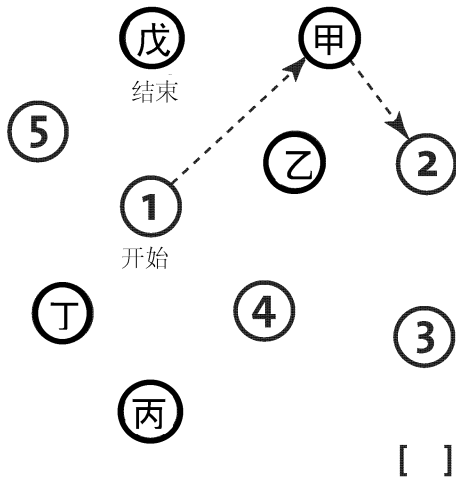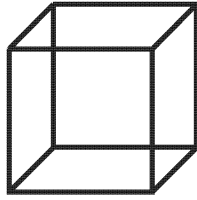

复制  
立方体

画钟表 (11点过10分) (3分)

得分

[ ] [ ] [ ]  
轮廓 数字 指针

\_\_\_/5

### 命名

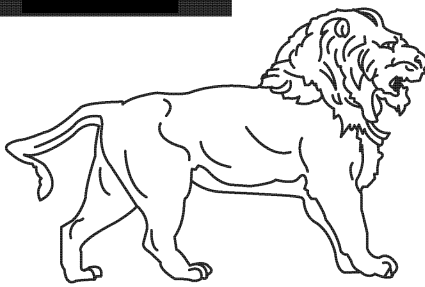

[ ]

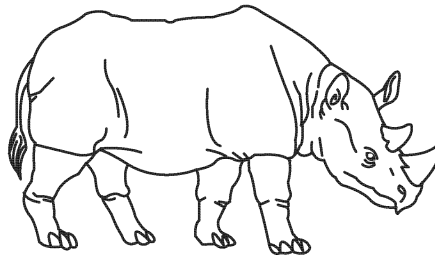

[ ]

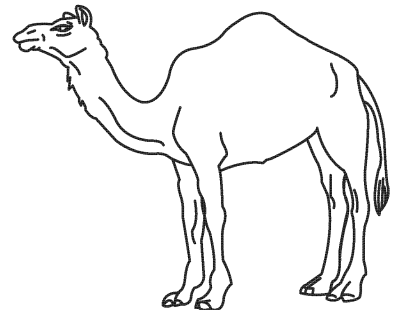

[ ]

\_\_\_/3

### 记忆

读出下列词语,而后由患者重复  
上述过程重复2次  
5分钟后回忆

|     |    |     |    |    |    |             |
|-----|----|-----|----|----|----|-------------|
|     | 面孔 | 天鹅绒 | 教堂 | 菊花 | 红色 | 不<br>计<br>分 |
| 第一次 |    |     |    |    |    |             |
| 第二次 |    |     |    |    |    |             |

### 注意

读出下列数字,请患者重复  
(每秒1个)

顺背 [ ] 2 1 8 5 4  
倒背 [ ] 7 4 2

\_\_\_/2

读出下列数字,每当数字1出现时,患者必须用手敲打一下桌面,错误数大于或等于2个不给分

[ ] 5 2 1 3 9 4 1 1 8 0 6 2 1 5 1 9 4 5 1 1 1 4 1 9 0 5 1 1 2

\_\_\_/1

100连续减7

[ ] 93 [ ] 86 [ ] 79 [ ] 72 [ ] 65

4-5个正确给3分,2-3个正确给2分,1个正确给1分,全都错误为0分

\_\_\_/3

### 语言

重复: 我只知道今天张亮是来帮过忙的人 [ ]  
狗在房间的时候,猫总是躲在沙发下面 [ ]

\_\_\_/2

流畅性: 在1分钟内尽可能多的说出动物的名字

[ ] \_\_\_\_\_ (N ≥ 11 名称)

\_\_\_/1

### 抽象

词语相似性:如香蕉-桔子=水果 [ ] 火车-自行车 [ ] 手表-尺子

\_\_\_/2

### 延迟回忆

回忆时不能提示

面孔

天鹅绒

教堂

菊花

红色

仅根据非提示回忆  
计分

\_\_\_/5

选项

分类提示

多选提示

### 定向

[ ] 日期 [ ] 月份 [ ] 年代 [ ] 星期几 [ ] 地点 [ ] 城市

\_\_\_/6
